# Supplementary material for: Analysis of energy evolution and failure mechanism of cemented tailings backfill with voids
Source: Research Square preprint supplement (doi:10.21203/rs.3.rs-7002080/v1), 2026-01-14
Supplement: Supplementary file 1 [file 24d412f2e4dbfd5eff63835d.docx]

1. The study was conducted on the macro and micro aspects of cemented tailings backfill with voids.
2. The energy evolution law of cemented tailings backfill with voids was studied.
3. The study investigated the internal crack propagation patterns, inclination angles, and quantity of cracks in cemented tailings backfill with voids under compressive loading.
4. The study focused on the changes in the force chain of cemented tailings backfill with voids before and after compression.
